# Supplementary material for: An ultra-stretchable, highly sensitive and biocompatible capacitive strain sensor from an ionic nanocomposite for on-skin monitoring
Source: Royal Society of Chemistry journal article supplement (doi:10.1039/c8nr08589g), 2019-01-01
Supplement: c8nr08589g1.pdf [file c8nr08589g1.pdf]

## Supporting Information

### Ultra-stretchable, Highly Sensitive and Biocompatible Capacitive Strain Sensor from an Ionic Nanocomposite for Skin-on Monitoring

Haihua Xu, <sup>\*a,b,c</sup> Ying Lv, <sup>a,b,c</sup> Dexing Qiu, <sup>a,b,c</sup> Yongjin Zhou, <sup>a,b,c</sup> Haoxuan Zeng, <sup>a,b,c</sup> Yican Chu <sup>a,b,c</sup>

<sup>a</sup>Department of Biomedical and Engineering, School of Medicine, Shenzhen University, Shenzhen, China.

<sup>b</sup>Guangdong Key Laboratory for Biomedical Measurements and Ultrasound Imaging, Shenzhen, China.

<sup>c</sup>National-Regional Key Technology Engineering Laboratory for Medical Ultrasound, Shenzhen, China.

\*Corresponding E-mail address: [hhxu@szu.edu.cn](mailto:hhxu@szu.edu.cn)

### 1. SEM image of the AgNFs network

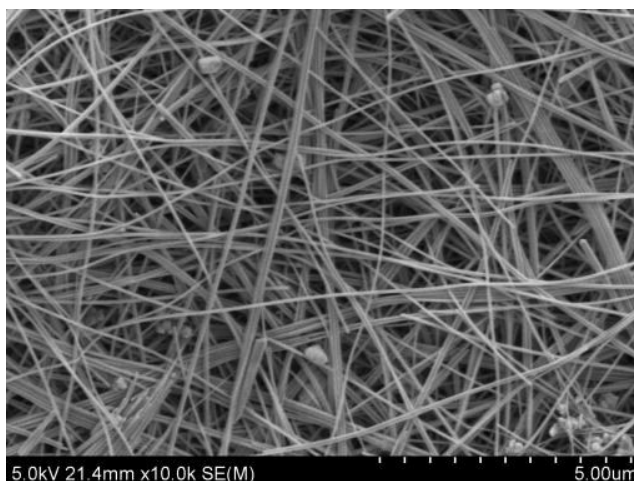

**Fig. S1.** SEM image of the AgNFs on the ACF electrode, showing the AgNFs are randomly stacked with layered porous structures with average length and diameter of AgNW 20  $\mu\text{m}$  and 100 nm

### 2. Biocompatibility measurements

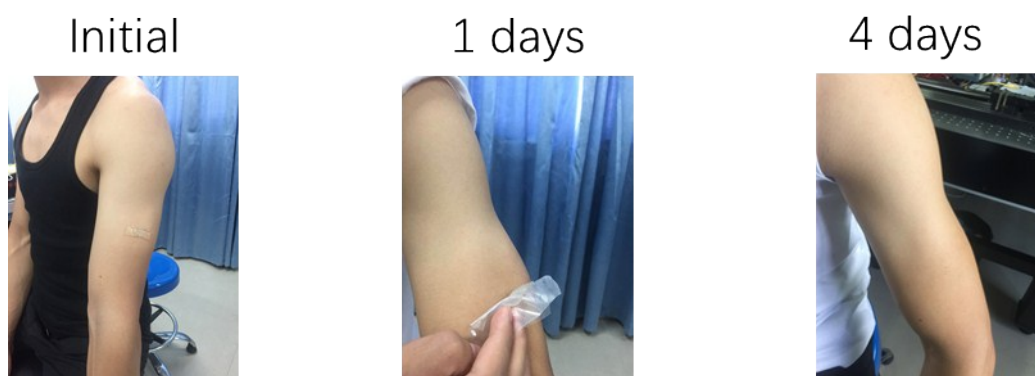

**Fig.S2.** Photographs of the skin surface of the arm where the *b*-hydrogel was attached on at the initial state (left), after 1 days (middle) and 4 days (right).

### 3. Strain-sensing response in a low stretch region (<10%)

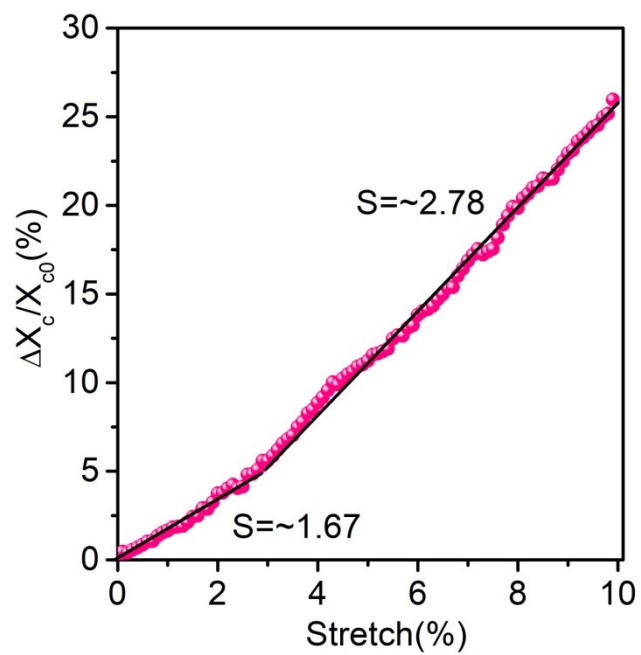

**Fig. S3.** Capacitive reactance change,  $\Delta X_c / X_{c0}$  as a function of stretch of the *b*-hydrogel ( $f=20$  Hz), the stretch range is from 0% to 10%.
